1 **Microbiome-based biomarkers to guide personalized microbiome-**  
2 **based therapies for Parkinson’s disease.**

3  
4 Haydeh Payami\* <sup>1,2</sup>, Timothy R Sampson <sup>2,3</sup>, Charles F Murchison <sup>1,2,4</sup>, Zachary D Wallen <sup>1,2</sup>

5  
6 <sup>1</sup> Department of Neurology, University of Alabama at Birmingham, Birmingham, AL, 35233, USA

7 <sup>2</sup> Aligning Science Across Parkinson’s (ASAP) Collaborative Research Network, Chevy Chase,  
8 MD, 20815, USA

9 <sup>3</sup> Department of Cell Biology, Emory University, Atlanta, GA, 30329, USA

10 <sup>4</sup> Department of Biostatistics, University of Alabama at Birmingham, Birmingham, AL, 35233,  
11 USA

12  
13 **\*Senior and Corresponding author:**

14 Haydeh Payami, PhD

15 University of Alabama at Birmingham, Room 429, Civitan International Research Center, 1719

16 6th Ave S, Birmingham, AL 35233

17 Phone: 205-994-1909

18 Email: haydehpayami@uabmc.edu

19  
20 **Running title:** Microbiome-based biomarkers

21 **Word count:** Abstract 191. Introduction 583. Method 1307. Results 616. Discussion 924.

22 35 references. 2 Tables. 3 Figures.

## 23 **Abstract**

24

25 We address an unmet challenge in Parkinson's disease: the lack of biomarkers to identify the  
26 right patients for the right therapy, which is a main reason clinical trials for disease modifying  
27 treatments have all failed. The gut microbiome is a new target for treatment of Parkinson's  
28 disease, with potential to halt disease progression. Our aim was to develop microbiome-based  
29 biomarkers to guide patient selection for microbiome-based clinical trials. We used microbial  
30 taxa that have been robustly associated with Parkinson's disease across studies and at high  
31 significance as dysbiotic features of Parkinson's disease. Using individual-level taxonomic  
32 relative abundance data, we classified patients according to their dysbiotic features, effectively  
33 defining microbiome-based subtypes of PD. We show that not all persons with Parkinson's  
34 disease have a dysbiotic microbiome, and not all dysbiotic Parkinson's disease microbiomes  
35 have the same features. Grounded in robust and reproducible data from differential abundance  
36 studies, we propose an intuitive and easily modifiable method to identify the optimal candidates  
37 for microbiome-based clinical trials, and subsequently, for treatments that are personalized for  
38 each individual's dysbiotic features. We demonstrate the method for Parkinson's disease. The  
39 concept, and the method, is generalizable for any disease with a microbiome component.

40

41

## 42 **Introduction**

43

44 Parkinson's disease (PD) is the fastest growing neurologic disease in the world <sup>1</sup>. PD is a  
45 progressively debilitating disease <sup>2</sup>. The earliest manifestations are often constipation, sleep  
46 disorder, and hyposmia, leading to the cardinal movement disorders, and as disease  
47 progresses, most patients develop psychosis and dementia. Treatments are symptomatic.  
48 There have been many clinical trials for disease modifying treatment aimed at stopping disease  
49 progression, and all have failed (clinicaltrials.gov). PD is a highly heterogenous disease. One  
50 treatment will not work for all patients. Biomarkers to guide selection of the right patients for the  
51 right drug has been a high-priority, unmet need.

52

53 It has long been known that constipation, inflammation in the gut, and permeable gut membrane  
54 are common in PD and precede motor signs <sup>2</sup>. Recent studies suggest some cases of PD start  
55 in the gut and spread to the brain, and in rodent models, PD pathologies are observed to spread

56 from gut to brain<sup>3-7</sup>. The gut origin raised the possibility that the gut microbiome could be  
57 involved in the brain-gut-axis pathology of PD. A healthy gut microbiome controls metabolism of  
58 drugs, toxicants and food, synthesis of vitamins and neurotransmitters, keeps the lining of the  
59 gut intact, protects against pathogens, maintains the proper functioning of the immune and  
60 nervous systems, and modulates brain-gut communication<sup>8</sup>.

61  
62 The gut microbiome is severely dysbiotic in PD, with characteristic features that are consistently  
63 observed in large-scale high-resolution shotgun metagenomic studies and meta-analysis of  
64 lower-resolution 16S studies<sup>9-13</sup>. Differential abundance analyses, conducted in different  
65 geographic locations and with different methods, have converged on species and pathways that  
66 are commonly dysbiotic in PD, among them are the following which we chose for the present  
67 study: reduced levels of bacteria that degrade fiber and elevated levels of *Bifidobacterium*,  
68 *Lactobacillus*, opportunistic pathogens (e.g., *Porphyromonas*), *Escherichia coli*, and certain  
69 species of *Streptococcus* and *Actinomyces*<sup>9-13</sup>. Functional analyses of these data suggest  
70 dysbiotic features of PD microbiome are relevant to multiple PD mechanisms, including  
71 increased abundance of pathogens and immunogens, decreased production of neuroactive  
72 molecules (dopamine, serotonin, glutamate and GABA), reduced capacity to degrade plant-  
73 based fiber which leads to short chain fatty acids deficiency, increased inflammation and  
74 compromised gut barrier, and elevated curli<sup>9</sup>. Curli is a bacterial amyloid produced by *E.coli*  
75 which, in mice, induces alpha-synuclein aggregation, the hallmark of PD pathology<sup>14,15</sup>. Data  
76 from genetic and toxicant-induced models of PD also suggest gut microbiome can trigger or  
77 contribute to various PD pathologies and the manifestation of motor and non-motor phenotypes  
78<sup>16-19</sup>, and that altering the microbiome via fecal microbiome transplantation (FMT)<sup>20,21</sup>, antibiotics  
79 treatments<sup>22-25</sup>, or high fiber diet<sup>26</sup>, each to some extent can reduce alpha-synuclein pathology,  
80 inflammation, and motor and non-motor dysfunction.

81  
82 The gut microbiome is an emerging target for PD therapies<sup>27,28</sup>. Results of early clinical trials  
83 with fiber supplementation<sup>29</sup> and FMT<sup>30-33</sup> are promising. Next-generation targeted therapeutics  
84 are forthcoming. One example (<https://www.axialtx.com/our-programs/parkinsons-disease/>) is a  
85 small molecule that reduces curli and hence could potentially attenuate disease progression by  
86 stopping curli-induced alpha-synuclein aggregation in the gut. The question is how to select  
87 patients to optimize success of microbiome-based clinical trials. Do all PD patients have  
88 elevated *E. coli* and curli? Is fiber supplementation sufficient to restore homeostasis to any  
89 dysbiotic microbiome? Are all persons with PD candidates for FMT? Here, we show that not all

90 PD patients have a dysbiotic microbiome and not all dysbiotic microbiomes have the same  
91 features. We introduce microbiome-based biomarkers to guide patient selection for clinical trials,  
92 and upon success, as companion diagnostic for personalized treatment.

93

## 94 **Method**

95

### 96 **Overview**

97

98 We explored the possibility of subtyping PD patients based on the dysbiotic features of the  
99 microbiome; and using the microbiome profile of an individual to gauge their suitability for  
100 microbiome-based drug trials. The premise requires that disease associated features are  
101 already well established, i.e., reproduced across studies, using multiple differential abundance  
102 test methods controlling for confounders, at high statistical significance<sup>9-13</sup>, and that the drug  
103 targeting a feature has undergone proper pre-clinical processes. The present paper describes a  
104 method to match patients to a treatment.

105

106 The overview of the method is shown in **Figure 1**. The concept and method are generalizable to  
107 any disorder with a microbiome component with well-established dysbiotic features, here, we  
108 focus on PD. The method requires a metagenomics reference dataset from a non-disease  
109 population. The reference dataset should be from the same population as the patients to be  
110 studied or treated (such reference datasets will soon be available for several populations). For  
111 demonstration, we select several features of PD as potential targets for treatment. (In reality, the  
112 feature can be a single gene or metabolite, a species, a cluster of related species, or multiple  
113 polymicrobial clusters that a drug has been developed to target.) We then calculate the mean  
114 relative abundance and confidence intervals (CI) of the features in the metagenomics dataset of  
115 non-disease population. We have now created the reference dataset. We define dysbiosis by  
116 setting thresholds for relative abundances in reference dataset (e.g., outside 95% CI). (We are  
117 cognoscente that “normal” and dysbiotic” microbiome are yet to be defined. Here, we use a  
118 working definition of dysbiotic to refer to abnormal levels of a well-established feature of PD  
119 microbiome). Patients can now be screened for dysbiotic features, which entails obtaining a  
120 stool sample, metagenomic sequencing and comparing the relative abundance of the features  
121 in the patient to the reference dataset and the thresholds that define dysbiosis.

122

123 Species-level data and a step-by-step protocol to reproduce the current work are in the  
124 Supplement as well as on ASAP-ZENODO Workplace (<https://zenodo.org/records/11126860>).  
125 The source data we used is public, available for download as raw data from SRA or processed  
126 data from Zenodo. Metagenomic sequences (raw data) are available at NCBI SRA under  
127 BioProject ID PRJNA834801. The full taxonomic profiling data (processed data) is available at  
128 Zenodo (<https://zenodo.org/records/7246185>).

129

## 130 **Foundation of the method**

131

132 Here, we use the data from the largest high-resolution metagenomic study of PD, published by  
133 Wallen et al.<sup>9</sup>. The Wallen et al. study was compliant with all relevant ethical regulations and  
134 was approved by Institutional Review Boards at University of Alabama at Birmingham and by  
135 the Human Research Protection Office of United States Department of Defense (funding  
136 agency). All subjects signed informed consent, including granting permission to share and use  
137 their de-identified data in subsequent studies.

138

139 The dataset is composed of deep-shotgun next-generation metagenome sequences of microbial  
140 DNA, extracted from stool samples of 490 individuals with PD and 234 neurologically healthy  
141 controls (NHC). Each metagenome (data point) represents one sample taken from one  
142 individual. Wallen et al. conducted differential abundance test via a metagenome-wide  
143 association study (MWAS) and identified species, genes and pathways that are depleted or  
144 overly abundant in PD. The feature we use here have been reproduced in other metagenomics  
145 and meta-analyses<sup>9-13</sup>. We also conducted correlations network analysis and identified  
146 polymicrobial clusters of species whose abundances grow or shrink together<sup>9</sup>. The visual of PD  
147 microbiome in Wallen et al data is depicted in correlation network (**Figure 2**). Species are  
148 plotted according to correlation in their abundances, forming clusters of correlated species,  
149 using SparCC (RRID:SCR\_022734, <https://web.mit.edu/almlab/sparcc.html>).

150

## 151 **The concept**

152

153 The published studies have been microbiome-centric, i.e., they identified dysbiotic features in  
154 aggregates of patients as compared to controls. We now turn the approach around and make it  
155 individual-centric, i.e., what does the microbiome of one patient look like? Is the microbiome  
156 dysbiotic in every PD patient? Are all dysbiotic features present together, or are some features

157 present in a subset of patients, and if so, what percentage of patients has a given dysbiotic  
158 feature? The answers to these questions are fundamental to any microbiome-based  
159 therapeutic. To answer these questions, we had to (a) select features of interest that could  
160 potentially be a target of treatment and (b) create an operational definition of dysbiosis. The  
161 concept is generalizable to any disease and any microbiome in the body, and the method, both  
162 feature selection and definition of dysbiosis, can be modified to accommodate study design.

163

## 164 **Features of PD gut microbiome**

165

166 For feature selection, we used the data reported in Wallen et al<sup>9</sup> and selected species that were  
167 significantly associated with PD (i.e., their relative abundance was elevated or reduced in PD  
168 not only in Wallen et al but reproduced across studies<sup>9-13</sup>), plus the cluster of rare opportunistic  
169 pathogens were too rare to be tested individually but form a polymicrobial cluster that was  
170 shown in two independent datasets to be elevated in PD<sup>9,35</sup>. We grouped the selected PD-  
171 associated species into six features based on the correlation in their abundances ( $|r|>0.2$ ,  
172  $P<0.05$ ) and taxonomic relatedness (members of same genus). The six dysbiotic features  
173 (**Table 1, Figure 2**) are as follows: (1) the cluster of opportunistic pathogens (elevated in PD),  
174 (2) species of *Bifidobacteria* (elevated in PD), (3) species of *Lactobacillus* (elevated in PD), (4)  
175 *Streptococcus* and *Actinomyces* species that are elevated in PD, (5) *E. coli* and *Klebsiella*  
176 species that are elevated in PD, and (6) fiber-degrading bacteria (reduced in PD). There is more  
177 to the dysbiosis of PD gut than these six features. Here, the aim being demonstrating the  
178 method, we strived for a balance between minimizing complexity while capturing the most  
179 robust and biologically relevant features.

180

## 181 **Definition of dysbiotic and non-dysbiotic**

182

183 Defining healthy and dysbiotic microbiome has been a challenge. For this project, we limited  
184 the definition of dysbiotic to a metagenome that has very high or very low relative abundance of  
185 a feature that is already well-established to be elevated or reduced in PD. To define very high  
186 and very low, we set extreme thresholds to maximize the odds that the patient being enrolled in  
187 trial is an optimal candidate. These thresholds can be changed to accommodate study design,  
188 or relaxed when a drug is approved, and the biomarker becomes a companion diagnostic for  
189 treatment.

190

191 For each feature, and per person, we calculated total relative abundance of each feature by  
192 summing the relative abundances of the species within it. We then calculated the mean relative  
193 abundance and its 95% CI in NHC (reference dataset). Next, we turned to individual-level PD  
194 data. Considering each feature separately, we called a PD person's metagenome dysbiotic if the  
195 relative abundance of the feature was outside the 95% CI of NHC. For features that are  
196 elevated in PD in aggregate data, a PD individual's gut was called dysbiotic if the relative  
197 abundance of the feature in that person was greater than the upper bound of 95% CI of NHC.  
198 For the feature that is reduced in PD, a PD individual's microbiome was called dysbiotic if the  
199 relative abundance of the feature in that person was less than the lower bound of 95% CI of  
200 NHC (**Table 2**).

201  
202 A key question was whether all individuals with PD have a dysbiotic gut microbiome. To answer  
203 this question, we needed an operational definition of non-dysbiotic. We defined non-dysbiotic  
204 per feature as being well within the norm of NHC range, i.e., below the mean of NHC if the  
205 feature is elevated in PD, and above the mean if a feature is reduced in PD. When considering  
206 all six features, a PD person was designated as not having a dysbiotic microbiome only if their  
207 relative abundance for the five elevated features were all at or below the mean of NHC, and  
208 their relative abundance for reduced fiber degrading feature was at or greater than the mean in  
209 NHC.

210

## 211 **Results**

212

213 **Not all PD metagenomes are dysbiotic, and not all dysbiotic microbiomes have the same**  
214 **features.**

215

216 In Wallen et al data, among the 490 individuals with PD studied, 392 (80%) had at least one  
217 dysbiotic feature (**Figure 3a**). 98 (20%) did not have any dysbiotic feature defined as being  
218 outside the 95% CI of NHC. Using the more cautious definition of non-dysbiotic, i.e. elevated  
219 features being at or below the NHC mean and reduced features at or above the NHC mean, 76  
220 (16%) of PD microbiomes were not dysbiotic. The patients without a dysbiotic microbiome can  
221 be identified and excluded from microbiome-based therapeutics; doing so will boost power and  
222 odds of success of clinical trials, and in clinical setting, will spare these patients unnecessary  
223 trial and error in finding the right treatment.

224

225 Severe reduction in fiber-degrading bacteria was seen in 333 of 490 of PD patients (68%)  
226 (**Figure 3a**). Among the 333 low fiber-degraders, only 96 had no other dysbiotic features  
227 (**Figure 3b**), hence 71%  $(=(333-96)/333)$  of patients with low fiber-degraders had high levels of  
228 at least one other dysbiotic feature. Thus, while deficiency of fiber degraders is very common,  
229 only 20%  $(=96/490)$  of PD patients had low fiber-degraders as their sole feature. This suggests  
230 that while fiber treatment would be beneficial for majority of patients, a subset would stand to  
231 benefit the most from fiber, while others may need treatment for their other dysbiotic features as  
232 well.

233  
234 Features that are elevated in PD were found in subsets of patients: high levels of opportunistic  
235 pathogens was detected in 66 (13%) of the 490 PD, *Bifidobacterium* in 161 (33%), *Lactobacillus*  
236 in 103 (21%), *Streptococcus* and *Actinomyces* in 94 (19%), and *E. coli* and *Klebsiella* in 86  
237 (18%). To demonstrate utility of the biomarker, consider *E. coli* which has been linked to  
238 pathobiology of PD. *E. coli* encodes curli, an amyloid that induces alpha-synuclein aggregation  
239 in mice<sup>14,15</sup>. Alpha-synuclein aggregation is a pathogenic hallmark of PD. Moreover, *E. coli* and  
240 genes that encode and regulate curli production are elevated in PD gut<sup>9</sup>. A drug developed  
241 against *E. coli* or curli will likely have a better odds of success in clinical trial if patients were  
242 chosen from the 18% that have high levels of *E. coli* and curli.

243  
244 There is some overlap across the groups shown in **Figure 3a**, because these features are not  
245 mutually exclusive. For example, as shown in **Figure 3b**, among the 66 patients with high  
246 opportunistic pathogens, 33 (50%) also had high *Bifidobacteria*, 15 (23%) had high  
247 *Lactobacillus*, 18 (27%) had high *Streptococcus* and *Actinomyces*, 13 (20%) had *E. coli* and  
248 *Klebsiella*, and 57 (86%) had low fiber degraders. These data suggest that at the present time,  
249 with fiber and FMT being the only microbiome-based treatments, the most rational option for  
250 treating the patients who have a severely dysbiotic microbiome is cleansing the microbiome with  
251 antibiotics followed by FMT, excluding those without dysbiosis and those with only low fiber-  
252 degraders. We are not advocating for FMT or any treatment modality per se, rather, pointing out  
253 the utility of biomarkers in designing a study as well as choosing the patients to study and treat.

254

### 255 **Application of the biomarker tool**

256

257 Defining the features of interest and setting abundance thresholds to define dysbiotic/non-  
258 dysbiotic in a healthy population will constitute the reference dataset for this biomarker tool. To



259 determine the composition of the metagenome of a patient will entail obtaining a stool sample,  
260 extracting the DNA, sequencing, bioinformatic processing and taxonomic assignment of  
261 sequences, and calculating relative abundances of the microbial features in the individual's  
262 metagenome. The patient's relative abundances for the features of interest are then compared  
263 to the reference dataset to determine if they are dysbiotic (**Figure 1**).

264

## 265 **Discussion**

266

267 Meta-analyses and large metagenomic studies have converged on certain microbial features  
268 that consistently and significantly are altered in PD microbiome, independent of geography,  
269 confounding covariates, and methodology. These well-established disease-associated taxa are  
270 pre-requisite to, and the foundation of biomarkers described here. Here, we used these robust  
271 associations to define subtypes of PD based on dysbiotic features of microbiome. We  
272 introduced a microbiome-based biomarker tool to guide patient selection for clinical trials and to  
273 serve as companion diagnostic for personalized treatments. With this tool, we can “see” if and  
274 what is dysbiotic in an individual and act accordingly. The method is applicable for any patient at  
275 any stage of disease. The tool can be easily modified (by redefining features and adjusting  
276 thresholds) as the field advances, and to meet varying needs of different studies. Here, we  
277 demonstrated the development and the potential utility of the tool for identifying subtypes of PD  
278 based on their microbiome features. The concept is generalizable to any disease with a  
279 microbiome component.

280

281 Treating a dysbiotic microbiome can potentially be disease modifying, which has been an  
282 elusive goal in PD field. Functional inference of human data and experiments in mice indicate  
283 dysbiotic features of PD microbiome contribute to several disease mechanisms, including alpha-  
284 synuclein aggregation which is at the core of PD pathology, disrupted neuro-signaling, and  
285 inflammation<sup>9,15,16</sup>. It is therefore reasonable to work towards microbiome-based therapies that  
286 could halt disease progression. As we learn which features are causal and which result from  
287 disease (an active area of research), microbiome-based biomarkers will be useful for identifying  
288 pathogenic dysbiosis early to prevent disease before onset.

289

290 Microbiome-based treatments under consideration for PD include prebiotics (e.g., fiber  
291 supplements), probiotics (beneficial bacteria packaged and marketed direct to consumer), FMT,  
292 and next generation therapeutics that are targeted to a specific feature (e.g., small molecules,

293 phage, CRSPR-Cas9). The microbiome-based biomarkers described here can serve as  
294 companion diagnostic for all treatment modalities. Take fiber supplementation for example,  
295 which is safe and likely beneficial for everyone. We show here that indeed, the majority of PD  
296 patients have severely depleted levels of fiber-degrading bacteria. Increasing fiber intake is  
297 effectively feeding these bacteria and causing them to grow and multiply, and it has shown  
298 promise in an early clinical trial with newly diagnosed PD patients <sup>29</sup>. The value of coupling  
299 biomarkers with fiber treatment is in identifying patients who, in addition to being low on fiber-  
300 degraders, have elevated levels of harmful pathogenic bacteria, which is an important  
301 consideration both for patient selections for clinical trials and for treating the individuals. As for  
302 probiotics on the market, most are composed of “beneficial” species of *Bifidobacteria* and/or  
303 *Lactobacillus*, which ironically, are highly elevated in PD. The value of the biomarker in this case  
304 is to avoid supplementation that is counter indicated. FMT is showing promise for PD <sup>30</sup>, but it  
305 carries risks concerning safety and compatibility of donor sample with host environment. Using  
306 biomarkers, unnecessary FMT can be avoided, sparing the patients who do not have a dysbiotic  
307 microbiome and those whose only problem is low fiber-degraders. Targeted treatments could  
308 replace the need for FMT, and they too would benefit from a companion diagnostic. For  
309 example, for a treatment targeted to abolish the opportunistic pathogens, the biomarker can  
310 identify the 13% of patients who would be the best candidates.

311  
312 Currently, we do not know if alleviating one dysbiotic feature would restore homeostasis to the  
313 rest of the microbiome, and what that central feature might be. Consumption of fiber is the  
314 safest and simplest treatment. In a clinical trial performed on 20 newly diagnosed PD patients,  
315 treatment with fiber increased the abundance of fiber-degrading bacteria and production of short  
316 chain fatty acids and resulted in shifts in the microbiome community <sup>29</sup>. Fiber-degrading species  
317 are in the center of the correlation network with tight positive and negative correlations to  
318 several PD-associated species (**Figure 2**). It is therefore plausible that fiber treatment, aimed to  
319 increase the abundance of fiber-degrading bacteria, may restore equilibrium to PD-associated  
320 species that map to the center of network and are either positively or negatively correlated with  
321 fiber-degraders. However, while possible, it is less likely that fiber treatment alone would  
322 eliminate overabundance of opportunistic pathogens, for example, considering that opportunistic  
323 pathogens are a dense isolated cluster with no connection to fiber-degrading species.

324  
325 Profiling the patients’ metagenome and comparing them to the reference dataset will show  
326 where they fall in the spectrum of dysbiosis. This concept, and the proposed method, holds true

327 regardless of feature, disease, or dataset. However, the relative abundances of the features and  
328 therefore the range and thresholds for defining dysbiosis may differ across populations. Hence,  
329 it is important that the reference dataset is from the same source population as patients. Here,  
330 we used a cohort of neurologically healthy older adults from Birmingham, Alabama in United  
331 States for our reference dataset, as our patients are also from Birmingham. There are regional  
332 variation in microbiome, reflecting cultural, dietary, socioeconomic, and geographic influences.  
333 Despite regional variations, the main PD-associated features are robust and reproducible  
334 <sup>9,11,12,35</sup>. Even so, the relative abundances, and hence the thresholds for defining dysbiosis, may  
335 still vary across populations. Not every investigator can amass hundreds of controls to  
336 investigate population-specific abundances to set their thresholds. This impediment will be  
337 overcome soon by current efforts to collect all data generated and made public. These  
338 collaborative global efforts are aimed at meta-analyses, a by-product of which will be open-  
339 access to well-curated datasets from across the world that can be used as reference datasets to  
340 generate population-specific thresholds for biomarkers and companion diagnostics.

341

#### 342 **Data availability**

343 The dataset used for biomarker development is publicly available, open access with no  
344 restrictions, as described in detail in Wallen et al 2022<sup>9</sup>. The dataset is available on  
345 two repositories to enable the investigators to download the data in either the raw or  
346 processed form. The raw metagenomic sequences and accompanying metadata are on NCBI  
347 SRA under BioProject ID PRJNA834801 [<https://www.ncbi.nlm.nih.gov/bioproject/834801>]. The  
348 post-QC and post taxonomic profiling data are on Zenodo [<https://zenodo.org/record/7246185>].  
349 Here we used species-level data (presented in Supplement) that was extracted from the  
350 taxonomic profiling data downloaded from Zenodo in January 2024.

351

#### 352 **Code and software**

353 Algorithm was developed using Microsoft Excel v.16.84 (RRID:SCR\_016137)  
354 <https://www.microsoft.com/en-gb/>. Numbers were double checked using R v4.3.3.  
355 (RRID:SCR\_001905) <https://www.r-project.org/>. Both Excel and R code are provided in the  
356 Supplement, as well as in ASAP-ZENODO Workplace (<https://zenodo.org/records/11126860>).

357

#### 358 **Acknowledgements**

359 This work was supported by The Strain Endowed Chair in Parkinson's Disease to the University  
360 of Alabama at Birmingham (HP) and Aligning Science Across Parkinson's [ASAP-020527]

361 through the Michael J. Fox Foundation for Parkinson's Research (MJFF) (HP, TRS, CFM,  
362 ZDW). For the purpose of open access, the authors have applied a CC BY public copyright  
363 license to all Author Accepted Manuscripts arising from this submission. Opinions,  
364 interpretations, conclusions, and recommendations are those of the authors and are not  
365 necessarily endorsed by the funding agencies.

366

### 367 **Author contribution**

368 This is a collaborative team (genomics (HP), microbiology (TRS), statistics (CFM),  
369 bioinformatics (ZDW)). The lead/corresponding author (HP) conceptualized and developed the  
370 method. HP drafted the manuscript and all authors contributed to revision and approved the  
371 final version.

372

### 373 **Competing interest**

374 HP has intellectual property pending on Personalized Microbiome-Based Therapies, Serial No.:  
375 63/571,787; Filing Date: March 29, 2024. TRS is a co-inventor on intellectual property related  
376 to a small molecule microbiome-based therapy - US Patent 11,707,493 and 11,147, 792.

377

### 378 **References**

379

- 380 1 Collaborators, G. B. D. P. s. D. Global, regional, and national burden of Parkinson's  
381 disease, 1990-2016: a systematic analysis for the Global Burden of Disease Study 2016.  
382 *Lancet Neurol* **17**, 939-953 (2018). [https://doi.org/10.1016/S1474-4422\(18\)30295-3](https://doi.org/10.1016/S1474-4422(18)30295-3)
- 383 2 Obeso, J. A. *et al.* Past, present, and future of Parkinson's disease: A special essay on  
384 the 200th Anniversary of the Shaking Palsy. *Mov Disord* **32**, 1264-1310 (2017).  
385 <https://doi.org/10.1002/mds.27115>
- 386 3 Braak, H., Rub, U., Gai, W. P. & Del Tredici, K. Idiopathic Parkinson's disease: possible  
387 routes by which vulnerable neuronal types may be subject to neuroinvasion by an  
388 unknown pathogen. *J Neural Transm (Vienna)* **110**, 517-536 (2003).  
389 <https://doi.org/10.1007/s00702-002-0808-2>
- 390 4 Horsager, J. *et al.* Brain-first versus body-first Parkinson's disease: a multimodal imaging  
391 case-control study. *Brain* **143**, 3077-3088 (2020). <https://doi.org/10.1093/brain/awaa238>
- 392 5 Holmqvist, S. *et al.* Direct evidence of Parkinson pathology spread from the  
393 gastrointestinal tract to the brain in rats. *Acta Neuropathol* **128**, 805-820 (2014).  
394 <https://doi.org/10.1007/s00401-014-1343-6>

- 395 6 Breen, D. P., Halliday, G. M. & Lang, A. E. Gut-brain axis and the spread of alpha-  
396 synuclein pathology: Vagal highway or dead end? *Mov Disord* **34**, 307-316 (2019).  
397 <https://doi.org/10.1002/mds.27556>
- 398 7 Kim, S. *et al.* Transneuronal Propagation of Pathologic alpha-Synuclein from the Gut to  
399 the Brain Models Parkinson's Disease. *Neuron* **103**, 627-641 e627 (2019).  
400 <https://doi.org/10.1016/j.neuron.2019.05.035>
- 401 8 Fan, Y. & Pedersen, O. Gut microbiota in human metabolic health and disease. *Nat Rev*  
402 *Microbiol* **19**, 55-71 (2021). <https://doi.org/10.1038/s41579-020-0433-9>
- 403 9 Wallen, Z. D. *et al.* Metagenomics of Parkinson's disease implicates the gut microbiome  
404 in multiple disease mechanisms. *Nat Commun* **13**, 6958 (2022).  
405 <https://doi.org/10.1038/s41467-022-34667-x>
- 406 10 Palacios, N. *et al.* Metagenomics of the Gut Microbiome in Parkinson's Disease:  
407 Prodromal Changes. *Ann Neurol* **94**, 486-501 (2023). <https://doi.org/10.1002/ana.26719>
- 408 11 Romano, S. *et al.* Meta-analysis of the Parkinson's disease gut microbiome suggests  
409 alterations linked to intestinal inflammation. *NPJ Parkinsons Dis* **7**, 27 (2021).  
410 <https://doi.org/10.1038/s41531-021-00156-z>
- 411 12 Toh, T. S. *et al.* Gut microbiome in Parkinson's disease: New insights from meta-  
412 analysis. *Parkinsonism Relat Disord* **94**, 1-9 (2022).  
413 <https://doi.org/10.1016/j.parkreldis.2021.11.017>
- 414 13 Boktor, J. C. *et al.* Integrated Multi-Cohort Analysis of the Parkinson's Disease Gut  
415 Metagenome. *Mov Disord* **38**, 399-409 (2023). <https://doi.org/10.1002/mds.29300>
- 416 14 Chen, S. G. *et al.* Exposure to the Functional Bacterial Amyloid Protein Curli Enhances  
417 Alpha-Synuclein Aggregation in Aged Fischer 344 Rats and *Caenorhabditis elegans*. *Sci*  
418 *Rep* **6**, 34477 (2016). <https://doi.org/10.1038/srep34477>
- 419 15 Sampson, T. R. *et al.* A gut bacterial amyloid promotes alpha-synuclein aggregation and  
420 motor impairment in mice. *Elife* **9** (2020). <https://doi.org/10.7554/eLife.53111>
- 421 16 Sampson, T. R. *et al.* Gut Microbiota Regulate Motor Deficits and Neuroinflammation in a  
422 Model of Parkinson's Disease. *Cell* **167**, 1469-1480 e1412 (2016).  
423 <https://doi.org/10.1016/j.cell.2016.11.018>
- 424 17 Matheoud, D. *et al.* Intestinal infection triggers Parkinson's disease-like symptoms in  
425 Pink1(-/-) mice. *Nature* **571**, 565-569 (2019). <https://doi.org/10.1038/s41586-019-1405-y>
- 426 18 Radisavljevic, N. *et al.* Effects of Gut Microbiota Alterations on Motor, Gastrointestinal,  
427 and Behavioral Phenotype in a Mouse Model of Parkinson's Disease. *J Parkinsons Dis*  
428 **12**, 1479-1495 (2022). <https://doi.org/10.3233/JPD-223165>

- 429 19 Bhattarai, Y. *et al.* Role of gut microbiota in regulating gastrointestinal dysfunction and  
430 motor symptoms in a mouse model of Parkinson's disease. *Gut Microbes* **13**, 1866974  
431 (2021). <https://doi.org/10.1080/19490976.2020.1866974>
- 432 20 Sun, M. F. *et al.* Neuroprotective effects of fecal microbiota transplantation on MPTP-  
433 induced Parkinson's disease mice: Gut microbiota, glial reaction and TLR4/TNF-alpha  
434 signaling pathway. *Brain Behav Immun* **70**, 48-60 (2018).  
435 <https://doi.org/10.1016/j.bbi.2018.02.005>
- 436 21 Zhao, Z. *et al.* Fecal microbiota transplantation protects rotenone-induced Parkinson's  
437 disease mice via suppressing inflammation mediated by the lipopolysaccharide-TLR4  
438 signaling pathway through the microbiota-gut-brain axis. *Microbiome* **9**, 226 (2021).  
439 <https://doi.org/10.1186/s40168-021-01107-9>
- 440 22 Bisht, R., Kaur, B., Gupta, H. & Prakash, A. Ceftriaxone mediated rescue of nigral  
441 oxidative damage and motor deficits in MPTP model of Parkinson's disease in rats.  
442 *Neurotoxicology* **44**, 71-79 (2014). <https://doi.org/10.1016/j.neuro.2014.05.009>
- 443 23 Du, Y. *et al.* Minocycline prevents nigrostriatal dopaminergic neurodegeneration in the  
444 MPTP model of Parkinson's disease. *Proc Natl Acad Sci U S A* **98**, 14669-14674 (2001).  
445 <https://doi.org/10.1073/pnas.251341998>
- 446 24 Pu, Y. *et al.* Antibiotic-induced microbiome depletion protects against MPTP-induced  
447 dopaminergic neurotoxicity in the brain. *Aging (Albany NY)* **11**, 6915-6929 (2019).  
448 <https://doi.org/10.18632/aging.102221>
- 449 25 Kaur, B. & Prakash, A. Ceftriaxone attenuates glutamate-mediated neuro-inflammation  
450 and restores BDNF in MPTP model of Parkinson's disease in rats. *Pathophysiology* **24**,  
451 71-79 (2017). <https://doi.org/10.1016/j.pathophys.2017.02.001>
- 452 26 Abdel-Haq, R. *et al.* A prebiotic diet modulates microglial states and motor deficits in  
453 alpha-synuclein overexpressing mice. *Elife* **11** (2022).  
454 <https://doi.org/10.7554/eLife.81453>
- 455 27 Sorbara, M. T. & Pamer, E. G. Microbiome-based therapeutics. *Nat Rev Microbiol* **20**,  
456 365-380 (2022). <https://doi.org/10.1038/s41579-021-00667-9>
- 457 28 Tan, A. H., Lim, S. Y. & Lang, A. E. The microbiome-gut-brain axis in Parkinson disease -  
458 from basic research to the clinic. *Nat Rev Neurol* **18**, 476-495 (2022).  
459 <https://doi.org/10.1038/s41582-022-00681-2>
- 460 29 Hall, D. A. *et al.* An open label, non-randomized study assessing a prebiotic fiber  
461 intervention in a small cohort of Parkinson's disease participants. *Nat Commun* **14**, 926  
462 (2023). <https://doi.org/10.1038/s41467-023-36497-x>

- 463 30 DuPont, H. L. *et al.* Fecal microbiota transplantation in Parkinson's disease-A  
464 randomized repeat-dose, placebo-controlled clinical pilot study. *Front Neurol* **14**,  
465 1104759 (2023). <https://doi.org/10.3389/fneur.2023.1104759>
- 466 31 Cheng, Y. *et al.* Efficacy of fecal microbiota transplantation in patients with Parkinson's  
467 disease: clinical trial results from a randomized, placebo-controlled design. *Gut Microbes*  
468 **15**, 2284247 (2023). <https://doi.org/10.1080/19490976.2023.2284247>
- 469 32 Segal, A., Zlotnik, Y., Moyal-Atias, K., Abuhasira, R. & Ifergane, G. Fecal microbiota  
470 transplant as a potential treatment for Parkinson's disease - A case series. *Clin Neurol*  
471 *Neurosurg* **207**, 106791 (2021). <https://doi.org/10.1016/j.clineuro.2021.106791>
- 472 33 Xue, L. J. *et al.* Fecal microbiota transplantation therapy for Parkinson's disease: A  
473 preliminary study. *Medicine (Baltimore)* **99**, e22035 (2020).  
474 <https://doi.org/10.1097/MD.00000000000022035>
- 475 34 . (!!! INVALID CITATION !!! 9).
- 476 35 Wallen, Z. D. *et al.* Characterizing dysbiosis of gut microbiome in PD: evidence for  
477 overabundance of opportunistic pathogens. *NPJ Parkinsons Dis* **6**, 11 (2020).  
478 <https://doi.org/10.1038/s41531-020-0112-6>  
479

**Table 1. Six main dysbiotic features of PD gut microbiome**

| Feature                 | Species composition of feature       | PD association       | Number of connections |
|-------------------------|--------------------------------------|----------------------|-----------------------|
| Opp pathogens           | <i>Actinomyces turicensis</i>        | Increased as cluster | 8                     |
| Opp pathogens           | <i>Anaerococcus octavius</i>         | Increased as cluster | 4                     |
| Opp pathogens           | <i>Anaerococcus vaginalis</i>        | Increased as cluster | 5                     |
| Opp pathogens           | <i>Atopobium minutum</i>             | Increased as cluster | 8                     |
| Opp pathogens           | <i>Corynebacterium amycolatum</i>    | Increased as cluster | 2                     |
| Opp pathogens           | <i>Corynebacterium aurimucosum</i>   | Increased as cluster | 2                     |
| Opp pathogens           | <i>Finnegoldia magna</i>             | Increased as cluster | 7                     |
| Opp pathogens           | <i>Gemella asaccharolytica</i>       | Increased as cluster | 2                     |
| Opp pathogens           | <i>Peptoniphilus harei</i>           | Increased as cluster | 1                     |
| Opp pathogens           | <i>Peptoniphilus lacrimalis</i>      | Increased as cluster | 3                     |
| Opp pathogens           | <i>Peptoniphilus sp HMSC062D09</i>   | Increased as cluster | 7                     |
| Opp pathogens           | <i>Porphyromonas asaccharolytica</i> | Increased            | 6                     |
| Opp pathogens           | <i>Porphyromonas sp HMSC065F10</i>   | Increased as cluster | 11                    |
| Opp pathogens           | <i>Porphyromonas uenonis</i>         | Increased as cluster | 6                     |
| Opp pathogens           | <i>Prevotella bergensis</i>          | Increased as cluster | 1                     |
| Opp pathogens           | <i>Prevotella buccalis</i>           | Increased as cluster | 10                    |
| Opp pathogens           | <i>Prevotella disiens</i>            | Increased as cluster | 1                     |
| Opp pathogens           | <i>Prevotella timonensis</i>         | Increased as cluster | 8                     |
| Opp pathogens           | <i>Varibaculum cambriense</i>        | Increased as cluster | 10                    |
| <i>Bifidobacteria</i>   | <i>Bifidobacterium dentium</i>       | Increased            | 12                    |
| <i>Bifidobacteria</i>   | <i>Bifidobacterium bifidum</i>       | Increased            | 3                     |
| <i>Bifidobacteria</i>   | <i>Bifidobacterium breve</i>         | Increased            | 24                    |
| <i>Bifidobacteria</i>   | <i>Bifidobacterium gallinarum</i>    | Increased            | 14                    |
| <i>Bifidobacteria</i>   | <i>Bifidobacterium longum</i>        | Increased            | 5                     |
| <i>Bifidobacteria</i>   | <i>Bifidobacterium pullorum</i>      | Increased            | 12                    |
| <i>Bifidobacteria</i>   | <i>Bifidobacterium saeculare</i>     | Increased            | 13                    |
| <i>Lactobacillus</i>    | <i>Lactobacillus fermentum</i>       | Increased            | 14                    |
| <i>Lactobacillus</i>    | <i>Lactobacillus gasseri</i>         | Increased            | 10                    |
| <i>Lactobacillus</i>    | <i>Lactobacillus paragasseri</i>     | Increased            | 9                     |
| <i>Lactobacillus</i>    | <i>Lactobacillus salivarius</i>      | Increased            | 9                     |
| <i>Lactobacillus</i>    | <i>Lactobacillus reuteri</i>         | Increased            | 1                     |
| <i>Lactobacillus</i>    | <i>Lactobacillus rhamnosus</i>       | Increased            | 11                    |
| <i>Strepto / Actino</i> | <i>Actinomyces naeslundii</i>        | Increased            | 4                     |
| <i>Strepto / Actino</i> | <i>Actinomyces oris</i>              | Increased            | 16                    |
| <i>Strepto / Actino</i> | <i>Actinomyces sp HPA0247</i>        | Increased            | 3                     |
| <i>Strepto / Actino</i> | <i>Actinomyces sp oral taxon 448</i> | Increased            | 3                     |
| <i>Strepto / Actino</i> | <i>Streptococcus anginosus group</i> | Increased            | 10                    |



|                             |                                        |           |    |
|-----------------------------|----------------------------------------|-----------|----|
| <i>Strepto / Actino</i>     | <i>Streptococcus mutans</i>            | Increased | 13 |
| <i>Strepto / Actino</i>     | <i>Streptococcus vestibularis</i>      | Increased | 15 |
| <i>Strepto / Actino</i>     | <i>Streptococcus lutetiensis</i>       | Increased | 3  |
| <i>E. coli / klebsiella</i> | <i>Escherichia coli</i>                | Increased | 5  |
| <i>E. coli / klebsiella</i> | <i>Klebsiella pneumoniae</i>           | Increased | 3  |
| <i>E. coli / klebsiella</i> | <i>Klebsiella quasipneumoniae</i>      | Increased | 3  |
| Fiber-degraders             | <i>Blautia wexlerae</i>                | Decreased | 17 |
| Fiber-degraders             | <i>Blautia hansenii</i>                | Decreased | 17 |
| Fiber-degraders             | <i>Anaerostipes hadrus</i>             | Decreased | 48 |
| Fiber-degraders             | <i>Clostridium sp CAG 58</i>           | Decreased | 27 |
| Fiber-degraders             | <i>Eubacterium eligens</i>             | Decreased | 47 |
| Fiber-degraders             | <i>Eubacterium hallii</i>              | Decreased | 52 |
| Fiber-degraders             | <i>Eubacterium ramulus</i>             | Decreased | 25 |
| Fiber-degraders             | <i>Eubacterium rectale</i>             | Decreased | 21 |
| Fiber-degraders             | <i>Eubacterium sp CAG 38</i>           | Decreased | 22 |
| Fiber-degraders             | <i>Faecalibacterium prausnitzii</i>    | Decreased | 59 |
| Fiber-degraders             | <i>Fusicatenibacter saccharivorans</i> | Decreased | 45 |
| Fiber-degraders             | <i>Roseburia faecis</i>                | Decreased | 21 |
| Fiber-degraders             | <i>Roseburia intestinalis</i>          | Decreased | 21 |
| Fiber-degraders             | <i>Roseburia inulinivorans</i>         | Decreased | 27 |
| Fiber-degraders             | <i>Ruminococcus bicirculans</i>        | Decreased | 33 |
| Fiber-degraders             | <i>Ruminococcus lactaris</i>           | Decreased | 12 |

We selected species that individually, or as a cluster, were significantly elevated or reduced in PD<sup>9-13</sup>, and assigned them to a “feature” according to the correlation in their abundances (connectivity, see **Figure 2**) and their taxonomic relatedness (members of same genus). Here, our aim was to demonstrate the method, for which we strived for a balance between capturing the most robust association with PD and reducing the complexity. Features can be redefined to accommodate the aims of the investigation.

**Table 2. A working definition of dysbiotic for identifying microbiome-based subtypes of PD**

| Feature                            | Relative abundance of feature in 234 NHC |              |               | Relative abundance of feature in 490 PD |              |              | N among 490 PD outside 95% CI of NHC |
|------------------------------------|------------------------------------------|--------------|---------------|-----------------------------------------|--------------|--------------|--------------------------------------|
|                                    | Mean                                     | Upper 95% CI | Lower 95% CI  | Mean                                    | Upper 95% CI | Lower 95% CI |                                      |
| Opp. pathogens                     | 0.01%                                    | <b>0.01%</b> | 0.00%         | 0.10%                                   | 0.20%        | 0.00%        | 66 (13%)                             |
| <i>Bifidobacteria</i>              | 2.06%                                    | <b>2.66%</b> | 1.47%         | 5.07%                                   | 5.98%        | 4.17%        | 161 (33%)                            |
| <i>Lactobacillus</i>               | 0.11%                                    | <b>0.19%</b> | 0.04%         | 0.55%                                   | 0.74%        | 0.36%        | 103 (21%)                            |
| <i>Streptococcus / Actinomyces</i> | 0.19%                                    | <b>0.33%</b> | 0.06%         | 0.39%                                   | 0.54%        | 0.25%        | 94 (19%)                             |
| <i>E. coli / Klebsiella</i>        | 1.47%                                    | <b>2.23%</b> | 0.72%         | 1.94%                                   | 2.44%        | 1.43%        | 86 (18%)                             |
| Fiber-degraders                    | 22.35%                                   | 23.88%       | <b>20.81%</b> | 15.29%                                  | 16.36%       | 14.22%       | 333 (68%)                            |

In this context, the term dysbiotic refers to a microbiome in which the relative abundance of a well-established PD-associated feature is very high (for features that are elevated in PD) or very low (if reduced in PD). Here, each feature is composed of several PD-associated species, as shown in **Table 1**. The relative abundance of each species in each individual was calculated as reported before<sup>9</sup> and can be found here <https://zenodo.org/record/7246185>. We calculated relative abundance of each feature in each neurologically healthy control (NHC) and individual with PD by summing the relative abundances of the species within the feature for that individual. We then calculated the mean and 95% confidence interval (CI) of the mean in the NHC and PD separately. We set the threshold for defining dysbiotic at the upper 95% CI of NHC for features that are elevated in PD, and at lower 95% CI of NHC for fiber-degraders that are reduced in PD. Last column is the number of PD patients, among 490 total, who were called dysbiotic for each feature. For example, in 161 of 490 PD patients, the relative abundance of *Bifidobacteria* was higher than 2.66% which was the upper 95% CI limit of NHC. Similarly, in 333 of 490 patients, the relative abundance of fiber-degrading bacteria was lower than 20.81% which was the lower 95% CI limit in NHC. See Figure 3 for overlaps.

## Building the reference dataset

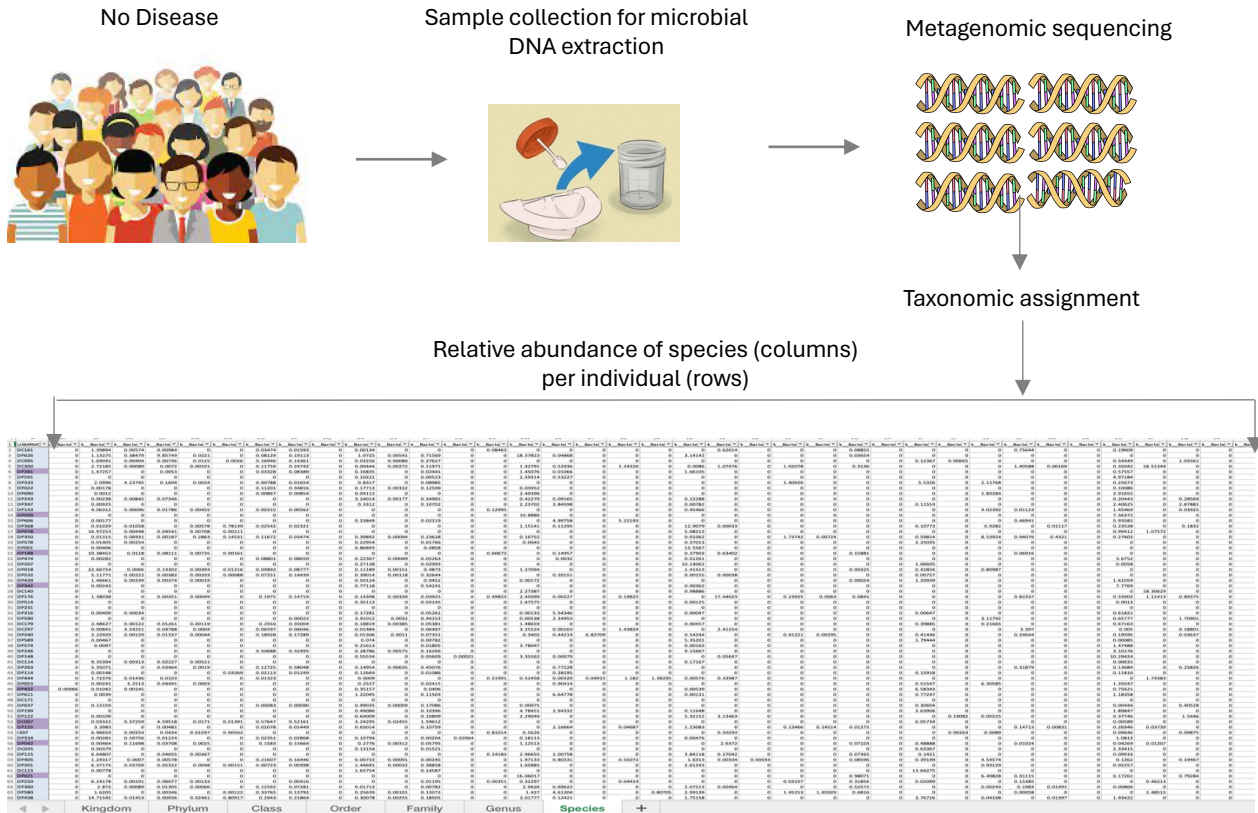

Relative abundances  
Range, mean  
95% CI in  
No Disease population

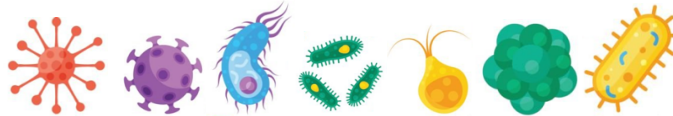

## Application

compare

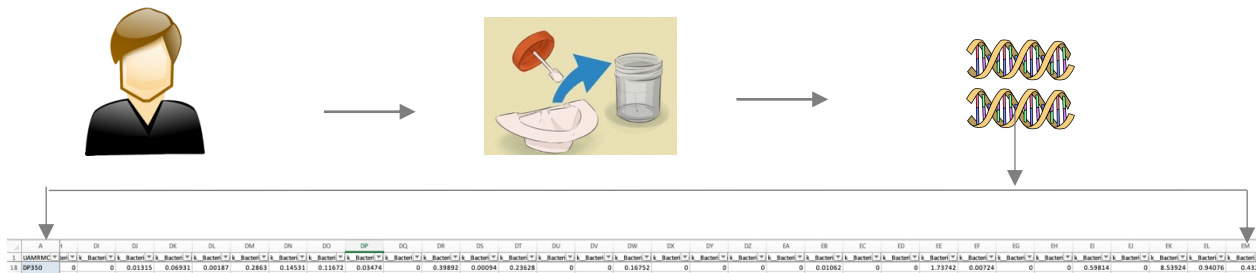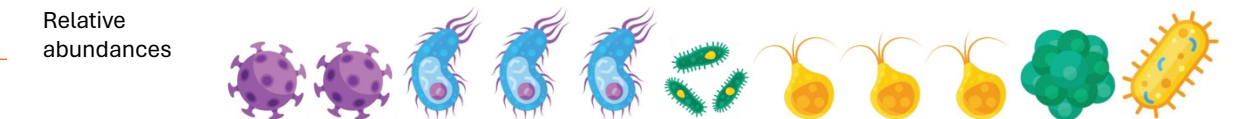

### **Figure 1. The method.**

For Parkinson's disease, several disease-associated microbial features have already been well established, i.e., reproduced across studies at high statistical significance using multiple differential abundance test methods and including covariates and confounders<sup>9-13</sup>. Clinical trials of microbiome-based treatments are underway. The present paper describes a method to match patients to treatments, excluding patients who do not have the feature of interest, and enriching the trial with patients with high abundance of the feature being targeted.

A reference dataset is built by obtaining the metagenomic profiles of a non-disease cohort that represents the same population as the persons to be studied or treated. Once this infrastructure is in place, one can pick any feature (from a microbial gene to species to polymicrobial clusters), calculate its relative abundance and confidence interval (CI) in the non-disease group, and set thresholds for defining dysbiotic and non-dysbiotic. Application entails obtaining the metagenomic profile of the individual of interest and comparing it to the non-disease population. Here, we selected 6 PD-associated features (each a polymicrobial cluster), 5 of which are elevated in PD, and one reduced in PD<sup>9</sup>. We set the threshold at 95%CI of the non-disease reference dataset. A person would be marked as dysbiotic for a feature if their relative abundance of that feature is above (for features that are elevated in PD) or below (for feature that are reduced) the 95%CI in non-disease population.

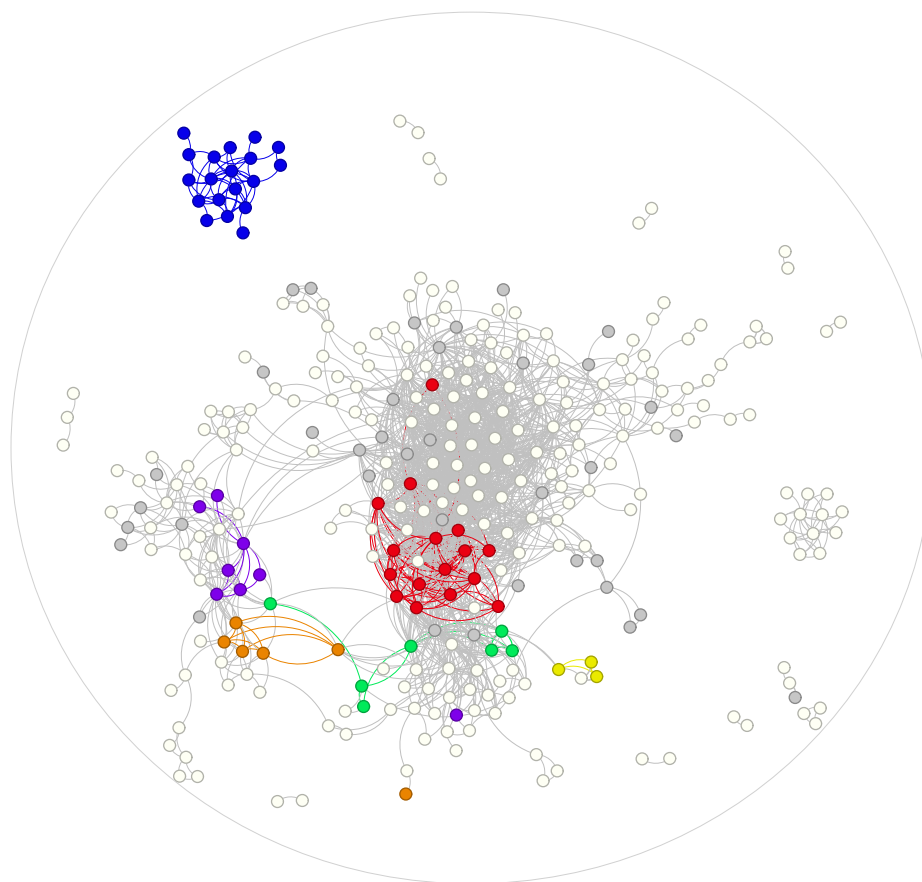

## Figure 2. Polymicrobial clusters of species in PD gut microbiome.

Pairwise correlation in relative abundances of all species detected in 490 unique PD gut metagenomes (i.e. 490 individuals with PD) was calculated and plotted (methods are described in Wallen et al<sup>9</sup>). Each circle (node) represents one species and the curved lines (edges) connect species whose relative abundance correlate with each other (at correlation  $|r| > 0.2$ , permuted  $P < 0.05$ ). Here, we have highlighted PD-associated species that were selected for this study, denoting by color the 6 dysbiotic features (species within each feature are listed in **Table 1**):

Blue: Opportunistic pathogens (elevated in PD)

Red: fiber-degraders (reduced in PD)

Yellow: *E. coli* and *Klebsiella* (elevated in PD)

Green: *Bifidobacteria* (elevated in PD)

Orange: *Lactobacillus* (elevated in PD)

Purple: *Streptococcus* and *Actinomyces* (elevated in PD)

Grey: associated with PD, not selected as feature

Empty circle: not associated with PD

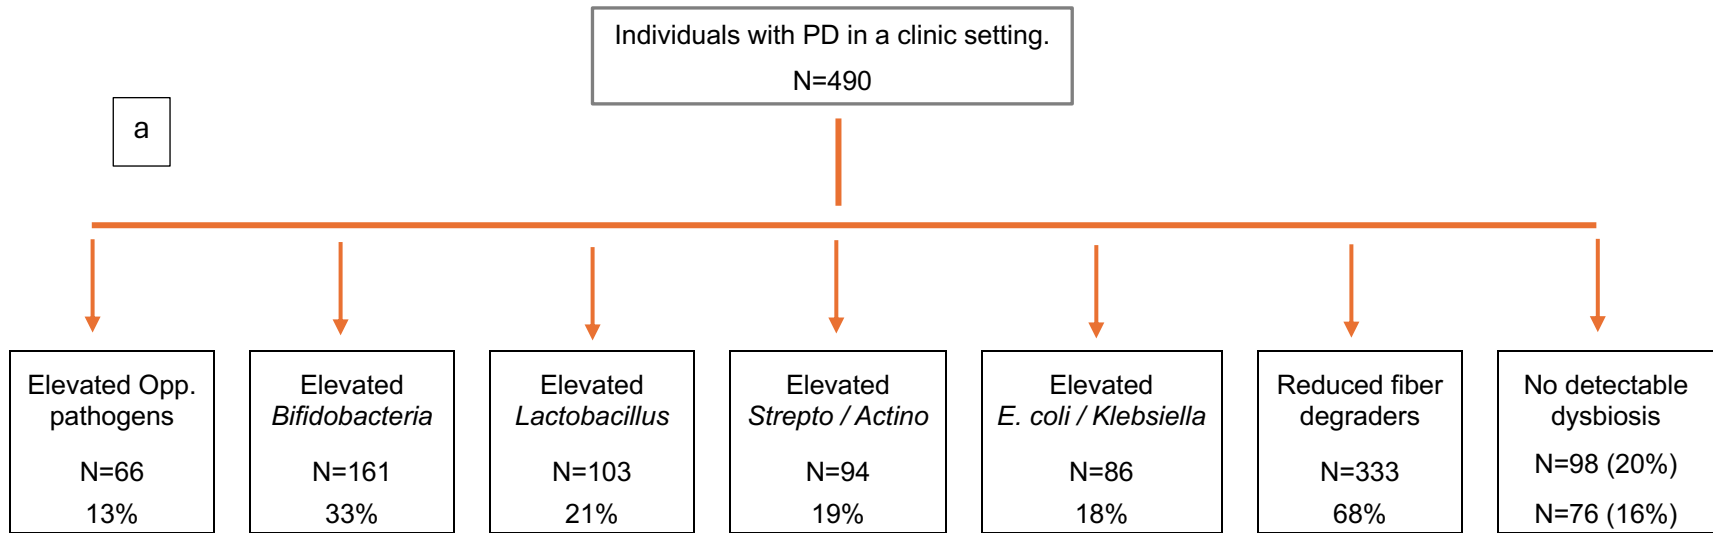

b

|                             | Opp path | <i>Bifido-bacteria</i> | <i>Lacto-bacillus</i> | <i>Strepto /Actino</i> | <i>E. coli / Klebsiella</i> | Fiber-degraders |
|-----------------------------|----------|------------------------|-----------------------|------------------------|-----------------------------|-----------------|
| Opp Pathogens               | 66       |                        |                       |                        |                             |                 |
| <i>Bifidobacteria</i>       | 33       | 161                    |                       |                        |                             |                 |
| <i>Lactobacillus</i>        | 15       | 49                     | 103                   |                        |                             |                 |
| <i>Strepto / Actino</i>     | 18       | 50                     | 47                    | 94                     |                             |                 |
| <i>E. coli / Klebsiella</i> | 13       | 27                     | 27                    | 22                     | 86                          |                 |
| Fiber-Degraders             | 57       | 135                    | 88                    | 81                     | 69                          | 333             |
| No Others                   | 5        | 18                     | 5                     | 5                      | 9                           | 96              |

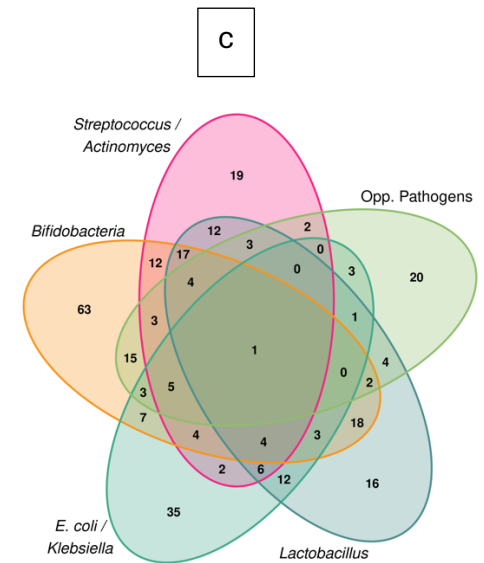

### Figure 3. Subtyping PD by the dysbiotic features of the gut microbiome.

The total number of patients is 490. The total number of patients with a dysbiotic feature is 392 (=490-98). The number of patients with a given dysbiotic feature are given in a-c. Actual numbers are given so that percentages can be calculated with the desired denominator.

(a) Proportion of PD patients with different dysbiotic features.

- Elevated features: number of PD persons, among the 490, who had an abundance higher than upper limit of the 95% CI of the abundance in neurologically healthy control (NHC).
- Reduced feature: number of PD persons, among the 490, who had an abundance lower than the lower limit of 95% CI of the abundance in NHC.
- No detectable dysbiosis: 98 of 490 (20%) did not fall outside 95% CI of NHC for any feature. 76 of 490 (16%) of PD persons fit the more cautious definition of non-dysbiotic, whose abundances for every elevated feature (opportunistic pathogens, *Bifidobacteria*, *Lactobacillus*, *Streptococcus* and *Actinomyces* (Strepto/Actino), and *E. coli/Klebsiella*) was below the NHC mean, and their abundance for reduced fiber-degrading bacteria was above the NHC mean.

(b) Pairwise overlap in features, n=number of patients, from 490, who have the two specified features. The total for six features (the diagonal) is 843, nearly double the number of 490 subjects, because features do co-occur in an individual. For example, 66 of 490 subjects had elevated (>95%CI of NHC) levels of opportunistic pathogens, among them, 33 (50%) also had elevated *Bifidobacteria*. Or the example in the text, 71% (=333-96)/333) of low fiber-degraders had high level of at least one other feature.

(c) Overlap across the 5 features that are elevated in PD (fiber-reducers not included for legibility). For example, 19 subjects have elevated levels (>95%CI of NHC) of *Streptococcus* and *Actinomyces* only, another 2 subjects have high *Streptococcus* and *Actinomyces* and high opportunistic pathogens, another 3 have high *Streptococcus* and *Actinomyces*, high opportunistic pathogens, and high *Lactobacillus*, etc.
